# Supplementary material
Source: HighWire-hosted journal article supplement (https://bmjopen.bmj.com/content/7/6/e015735)
Supplement: inline-supplementary-material-3 [file inline-supplementary-material-3.pdf]

**Supplemental table 1:** Baseline demographic and health characteristics of the overall 2001 cohort of new users of acid suppression therapy, by type of acid suppressant at time of cohort entry, and those who were ever exposed to PPI.

|                                                         |            | Overall cohort | New users of H2 Blockers at time of cohort entry | New users of PPI at time of cohort entry | Ever exposed to PPI <sup>a</sup> | P Value <sup>b</sup> |
|---------------------------------------------------------|------------|----------------|--------------------------------------------------|------------------------------------------|----------------------------------|----------------------|
| N                                                       |            | 396884         | 208492                                           | 188392                                   | 293265                           |                      |
| Age (SD)                                                |            | 62.98 (13.05)  | 61.93 (13.24)                                    | 64.14 (12.74)                            | 63.78 (12.81)                    | <0.001               |
| eGFR in mL/min/1.73m <sup>2</sup> (SD)                  |            | 74.74 (22.43)  | 76.24 (22.04)                                    | 73.09 (22.73)                            | 73.38 (22.61)                    | <0.001               |
| Number of outpatient serum creatinine measurements (SD) |            | 3.01 (3.40)    | 2.95 (3.23)                                      | 3.06 (3.58)                              | 4.52 (5.51)                      | <0.001               |
| Number of hospitalizations (SD)                         |            | 0.37 (0.96)    | 0.36 (0.95)                                      | 0.38 (0.97)                              | 0.51 (1.30)                      | <0.001               |
| Race                                                    | White (%)  | 318534 (80.26) | 164295 (78.80)                                   | 154239 (81.87)                           | 236930 (80.79)                   | <0.001               |
|                                                         | Black (%)  | 58355 (14.70)  | 32053 (15.37)                                    | 26302 (13.96)                            | 42498 (14.49)                    |                      |
|                                                         | Other (%)  | 19995 (5.04)   | 12144 (5.82)                                     | 7851 (4.17)                              | 13837 (4.72)                     |                      |
| Sex                                                     | Male (%)   | 377769 (95.18) | 197685 (94.82)                                   | 180084 (95.59)                           | 279023 (95.14)                   | <0.001               |
|                                                         | Female (%) | 19115 (4.82)   | 10807 (5.18)                                     | 8308 (4.41)                              | 14242 (4.86)                     |                      |
| Diabetes mellitus (%)                                   |            | 92555 (23.32)  | 46562 (22.33)                                    | 45993 (24.41)                            | 74344 (25.35)                    | <0.001               |
| Hypertension (%)                                        |            | 231296 (58.28) | 119554 (57.34)                                   | 111742 (59.31)                           | 184529 (62.92)                   | <0.001               |
| Chronic lung disease (%)                                |            | 75810 (19.10)  | 39270 (18.84)                                    | 36540 (19.40)                            | 64254 (21.91)                    | <0.001               |
| Peripheral artery disease (%)                           |            | 9141 (2.30)    | 4646 (2.23)                                      | 4495 (2.39)                              | 8751 (2.98)                      | 0.001                |
| Cardiovascular disease (%)                              |            | 122301 (30.82) | 59814 (28.69)                                    | 62487 (33.17)                            | 101220 (34.51)                   | <0.001               |
| Cerebrovascular disease (%)                             |            | 1529 (0.39)    | 776 (0.37)                                       | 753 (0.40)                               | 1419 (0.48)                      | 0.16                 |
| Dementia (%)                                            |            | 12031 (3.03)   | 6094 (2.92)                                      | 5937 (3.15)                              | 10615 (3.62)                     | <0.001               |
| Hyperlipidemia (%)                                      |            | 152040 (38.31) | 78546 (37.67)                                    | 73494 (39.01)                            | 130557 (44.52)                   | <0.001               |
| Hepatitis C (%)                                         |            | 9332 (2.35)    | 4832 (2.32)                                      | 4500 (2.39)                              | 8456 (2.88)                      | 0.14                 |
| HIV (%)                                                 |            | 209 (0.05)     | 105 (0.05)                                       | 104 (0.06)                               | 183 (0.06)                       | 0.51                 |
| Cancer (%)                                              |            | 46451 (11.70)  | 23312 (11.18)                                    | 23139 (12.28)                            | 39473 (13.46)                    | <0.001               |
| GERD (%)                                                |            | 110217 (27.77) | 52586 (25.22)                                    | 57631 (30.59)                            | 114132 (38.92)                   | <0.001               |

|                                                            |                                  |                                    |                       |                       |        |
|------------------------------------------------------------|----------------------------------|------------------------------------|-----------------------|-----------------------|--------|
| Upper GI tract bleeding (%)                                | 11282 (2.84)                     | 3352 (1.61)                        | 7930 (4.21)           | 12458 (4.25)          | <0.001 |
| Ulcer disease (%)                                          | 35189 (8.87)                     | 14152 (6.79)                       | 21037 (11.17)         | 37472 (12.78)         | <0.001 |
| H. Pylori infection (%)                                    | 2599 (0.65)                      | 477 (0.23)                         | 2122 (1.13)           | 3795 (1.29)           | <0.001 |
| Barrett's esophagus (%)                                    | 0 (0.00)                         | 0 (0.00)                           | 0 (0.00)              | 245 (0.08)            | NA     |
| Achalasia (%)                                              | 188 (0.05)                       | 41 (0.02)                          | 147 (0.08)            | 245 (0.08)            | <0.001 |
| Stricture (%)                                              | 2218 (0.56)                      | 415 (0.20)                         | 1803 (0.96)           | 2953 (1.01)           | <0.001 |
| Esophageal adenocarcinoma (%)                              | 223 (0.06)                       | 79 (0.04)                          | 147 (0.08)            | 262 (0.09)            | <0.001 |
| Years of follow up (IQR) <sup>c</sup>                      | 5.65<br>(5.05 – 6.28)            | 3.35<br>(1.01 – 5.71) <sup>d</sup> | 5.51<br>(5.01 – 6.08) | 5.23<br>(3.22 – 5.90) | <0.001 |
| Days of having related prescription during follow-up (IQR) | 587<br>(168 – 1423) <sup>e</sup> | 188<br>(90 – 561) <sup>d</sup>     | 621<br>(171 – 1496)   | 579<br>(172 – 1350)   | <0.001 |
| Death (%)                                                  | 102802 (25.90)                   | 31260 (14.99) <sup>d</sup>         | 51785 (27.49)         | 71565 (24.40)         | <0.001 |
| Incident death in 100 person years (95% CI)                | 5.08<br>(5.05 – 5.11)            | 4.40<br>(4.35 – 4.45) <sup>d</sup> | 5.56<br>(5.51 – 5.61) | 5.45<br>(5.41 – 5.49) | <0.001 |

- a. Includes patients exposed to PPI at T0 (n=275977) and during follow-up (n=33136). Variables were measured at time of PPI exposure.
- b. P value for difference between exposed to H2 at T0 and exposed to PPI at T0
- c. From T0 to first occurrence of death or September 30, 2013
- d. Outcome measured from T0 to first occurrence of exposure PPI, death or September 30, 2007
- e. Days of having PPI or H2 blockers

Abbreviations: CI, Confidence interval; eGFR, estimated Glomerular Filtration Rate; GERD, Gastroesophageal Reflux Disease; HIV, human immunodeficiency virus; IQR, interquartile range; NA, Not Applicable; SD, Standard deviation

**Supplemental table 2:** Duration of exposure to PPI and risk of death among new users of PPI in the 2001 cohort (n=101,109)

| Duration (Days)                                                                                                                                                                                                                                                                                                                                                                                                                                                                                                                                                                            | ≤ 30          | 31 - 90           | 91 - 180          | 181 - 360         | 361 - 720         |
|--------------------------------------------------------------------------------------------------------------------------------------------------------------------------------------------------------------------------------------------------------------------------------------------------------------------------------------------------------------------------------------------------------------------------------------------------------------------------------------------------------------------------------------------------------------------------------------------|---------------|-------------------|-------------------|-------------------|-------------------|
| N (%)                                                                                                                                                                                                                                                                                                                                                                                                                                                                                                                                                                                      | 15204 (15.04) | 20409 (20.19)     | 17137 (16.95)     | 21586 (21.35)     | 26773 (26.48)     |
| Hazard Ratio (95%CI)                                                                                                                                                                                                                                                                                                                                                                                                                                                                                                                                                                       | 1             | 1.04 (1.01, 1.07) | 1.11 (1.08, 1.15) | 1.18 (1.15, 1.22) | 1.28 (1.24, 1.31) |
| <p>a. Within people exposure to PPI between 1 to 720 days</p> <p>b. Model controls for eGFR, age, race, gender, number of serum creatinine measurements, number of hospitalizations, diabetes mellitus, hypertension, cardiovascular disease, peripheral artery disease, cerebrovascular disease, chronic lung disease, hepatitis C, HIV, dementia, cancer, GERD, upper GI tract bleeding, ulcer disease, H. Pylori infection, Barrett's esophagus, achalasia, stricture and esophageal adenocarcinoma</p> <p>c. Time zero defined as date when the patients last PPI prescription end</p> |               |                   |                   |                   |                   |
